# Supplementary material
Source: PubMed Central journal article supplement (PMC3719578)
Supplement: IAI.00224-13_zii999090238so1.pdf [file IAI.00224-13_zii999090238so1.pdf]

**Supplemental table 1.** PCR primers for recombinant plasmid construction and mutant strain identification.

| <b>Primers<sup>a</sup></b> | <b>Sequence (5'–3')</b>       | <b>Restriction site incorporated</b> |
|----------------------------|-------------------------------|--------------------------------------|
| <i>tuf1-L-f</i>            | TATCGATTACACCCACAAGAAG        | <i>Clal</i>                          |
| <i>tuf1-L-r</i>            | TGAATTCCTATCGAGCCGAAGACCAAGG  | <i>KpnI</i>                          |
| <i>tuf2-L-f</i>            | TGGTACCCGCCGTTGTTCTCTTTGTTT   | <i>EcoRI</i>                         |
| <i>tuf2-L-r</i>            | TGAATTCGAAAAGTTTTCTGGTGCGAAG  | <i>KpnI</i>                          |
| <i>B-tuf2-L-f</i>          | TAGATCTATGGCAAAGAGTAAGTTTGAAC | <i>BglII</i>                         |
| <i>B-tuf2-L-r</i>          | AGGTACCCGCTCTACCAACTGAGCTATAC | <i>KpnI</i>                          |
| <i>Kan<sup>r</sup>-f</i>   | TGGTACCGCGCGGAACCCCTATTTG     | <i>KpnI</i>                          |
| <i>Kan<sup>r</sup>-r</i>   | TCTGCAGCGGTGGAATCGAAATCTCGTG  | <i>PstI</i>                          |
| <i>tuf1-R-f</i>            | TCTCGAGCAACTTCAATATTCTGCGTGG  | <i>XhoI</i>                          |
| <i>tuf1-R-r</i>            | TCTGCAGGAAGATTGTGCAGGGGCGCTC  | <i>PstI</i>                          |
| <i>tuf2-R-f</i>            | TCTCGAGACGATCTGTTCGATCAGATC   | <i>XhoI</i>                          |
| <i>tuf2-R-r</i>            | TCTGCAGTGATTTTCGACCGGCGGTTTCG | <i>PstI</i>                          |
| <i>B-tuf2-R-f</i>          | TCTGCAGGACGGTCTCCAAAACCGTAGG  | <i>PstI</i>                          |
| <i>B-tuf2-R-r</i>          | TCTCGAGGATCAGATCGGACAAGCCTTTC | <i>XhoI</i>                          |
| <i>Id-tuf1-L-f</i>         | CAAGAGTGGTAATCGTGAGATCC       |                                      |
| <i>Id-tuf2-L-f</i>         | ACTTCAACGATCTTCTCGGTTCG       |                                      |
| <i>Id-tuf-R-r</i>          | TTCTTGACGAGTTCTTCTGAGCG       |                                      |

<sup>a</sup>Abbreviations: f, forward primer; r, reverse primer; B, back mutant primer; L, upstream sequence; R, downstream sequence; Id, Identification primers.
