# Supplementary material
Source: PubMed Central journal article supplement (PMC3719578)
Supplement: IAI.00224-13_zii999090238so2.pdf [file IAI.00224-13_zii999090238so2.pdf]

**Supplemental table 2.** Complete genomic sequences of M5-90 and M28: comparison with reference sequences of ATCC 23457 and 16M.

| Sequence           | M5-90        |           | M28          |           | ATCC 23457 <sup>a</sup> |               | 16M <sup>a</sup> |               |
|--------------------|--------------|-----------|--------------|-----------|-------------------------|---------------|------------------|---------------|
| Chromosome         | I            | II        | I            | II        | I                       | II            | I                | II            |
| Accession          | CP00185<br>1 | CP001852  | CP00245<br>9 | CP002460  | NC_0124<br>41           | NC_0124<br>42 | NC_00331<br>7    | NC_00331<br>8 |
| Size (bp)          | 2 126 446    | 1 185 778 | 2 126<br>133 | 1 185 615 | 2 125 701               | 1 185 518     | 2 117 144        | 1 177 787     |
| (G+C) %            | 57.15%       | 57.34%    | 57.15%       | 57.34%    | 57.15%                  | 57.35%        | 57.16%           | 57.34%        |
| CDS <sup>b</sup>   | 2174         | 1187      | 2173         | 1190      | 2063                    | 1073          | 2090             | 1075          |
| IS711 <sup>b</sup> | 7            | 2         | 7            | 2         | 7                       | 2             | 5                | 2             |
| rRNA <sup>b</sup>  | 8            | 4         | 8            | 4         | 8                       | 4             | 8                | 4             |
| tmRNA <sup>b</sup> | 2            |           | 2            |           | 2                       |               | 2                |               |
| tRNA <sup>b</sup>  | 41           | 14        | 41           | 14        | 41                      | 14            | 40               | 14            |

<sup>a</sup>Data from Wattam et al. [7] or the PATRIC website (<http://patric.vbi.vt.edu/>);

<sup>b</sup>Abbreviations: CDS, coding sequence; IS711 (or IS6501), insertion sequence (IS) element; rRNA, ribosomal RNA; tmRNA, transfer-messenger RNA; tRNA, transfer RNA.
